# Supplementary material for: Study of Cytotoxicity and Internalization of Redox-Responsive Iron Oxide Nanoparticles on PC-3 and 4T1 Cancer Cell Lines
Source: MDPI journal article supplement (doi:10.3390/pharmaceutics15010127), 2022-12-30
Supplement: s1 [file s1]

# Study of Cytotoxicity and Internalization of Redox-Responsive Iron Oxide Nanoparticles on PC-3 and 4T1 Cancer Cell Lines

Timur R. Nizamov <sup>1,\*†</sup>, Artem R. Iliasov <sup>1†</sup>, Stepan S. Vodopyanov <sup>1,2</sup>, Irina V. Kozhina <sup>1</sup>, Igor G. Bordyuzhin <sup>1</sup>, Dmitry G. Zhukov <sup>1</sup>, Anna V. Ivanova <sup>1</sup>, Elizaveta S. Permyakova <sup>1</sup>, Pavel S. Mogilnikov <sup>1</sup>, Daniil A. Vishnevskiy <sup>3</sup>, Igor V. Shchetinin <sup>1</sup>, Maxim A. Abakumov <sup>1,3</sup> and Alexander G. Savchenko <sup>1</sup>

<sup>1</sup> Department of Physical Materials Science, National University of Science and Technology (MISIS), Moscow 119049, Russia

<sup>2</sup> Department of Invertebrate Zoology, Faculty of Biology, Lomonosov Moscow State University, Moscow 119234, Russia

<sup>3</sup> Department of Medical Nanobiotechnology, N.I. Pirogov Russian National Research Medical University, Moscow 117997, Russia

\* Correspondence: nizamov.timur@gmail.com

† These authors contributed equally to this work.

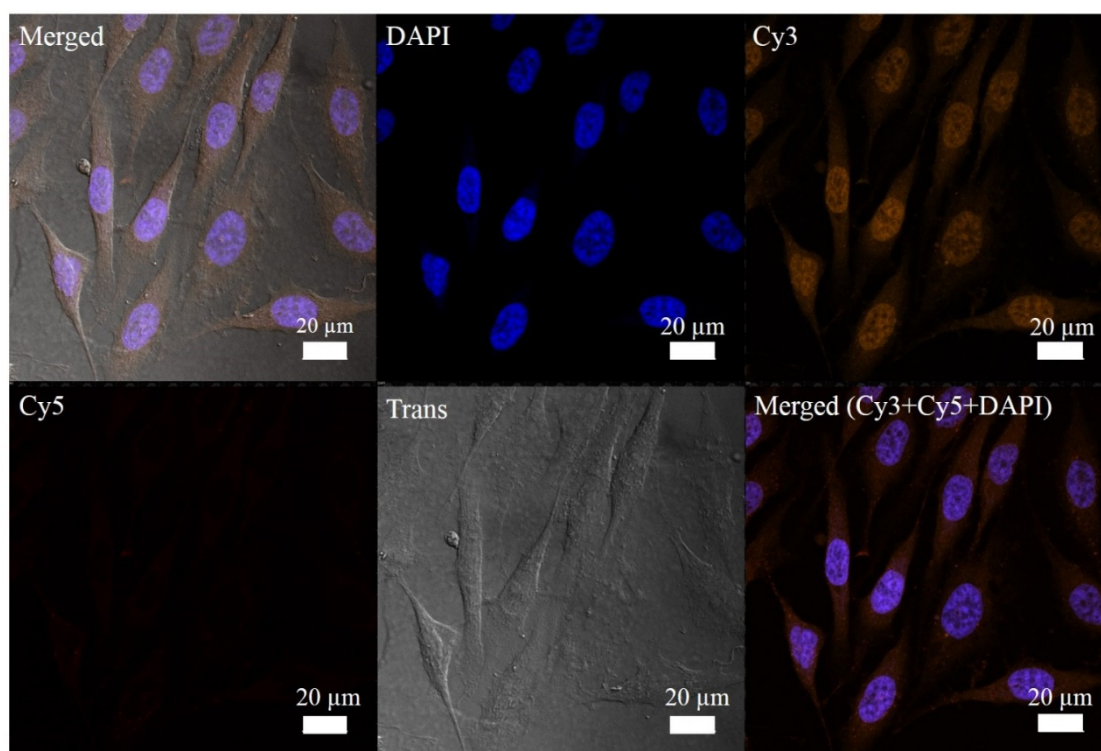

**Figure S1.** PC3 cells incubated with Cy3 and Cy5 fluorescently labeled MNP-SS nanoparticles for 1 h.

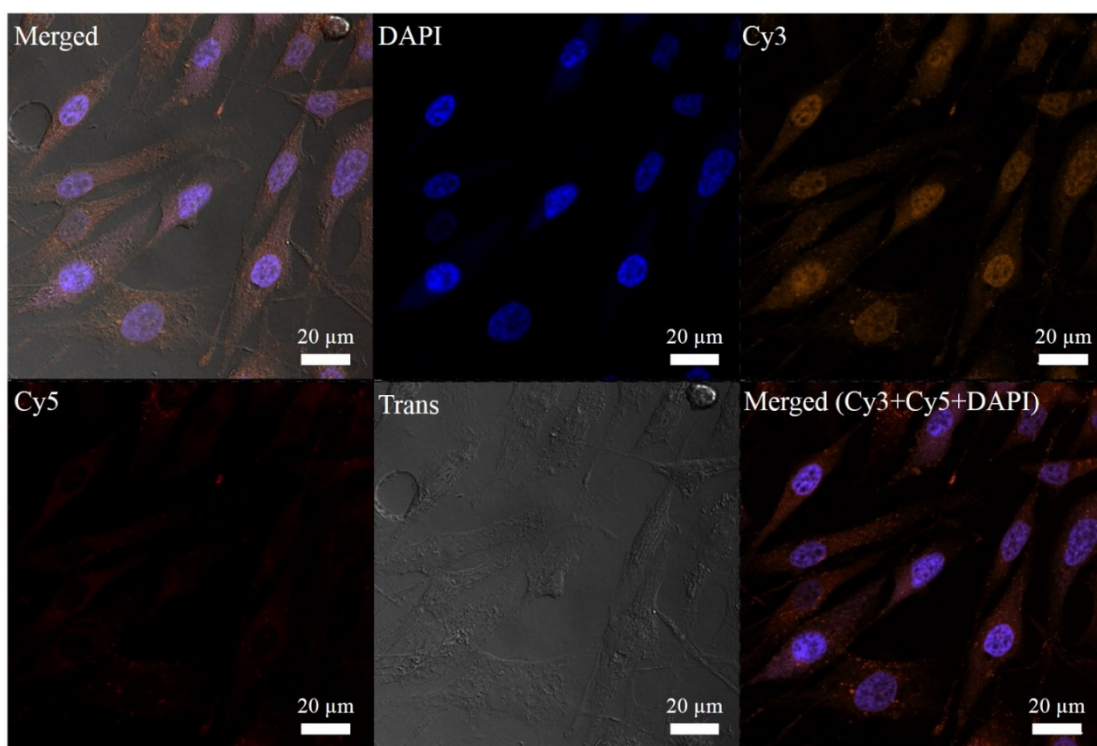

**Figure S2.** PC3 cells incubated with Cy3 and Cy5 fluorescently labeled MNP-SS nanoparticles for 4 h.

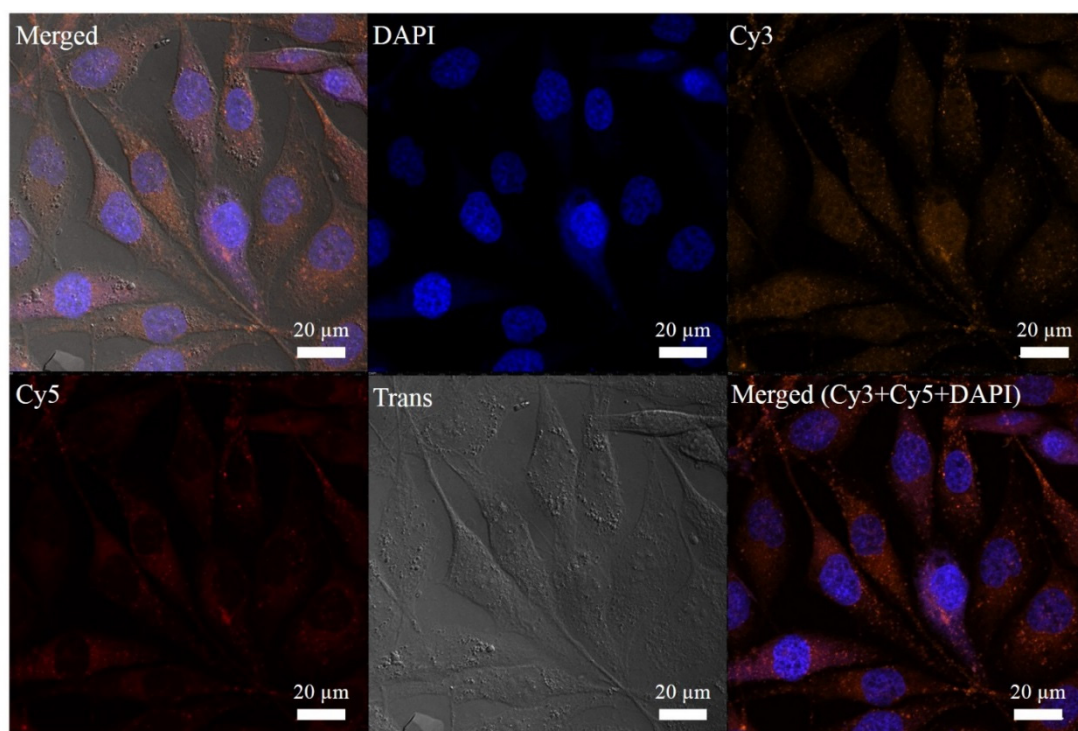

**Figure S3.** PC3 cells incubated with Cy3 and Cy5 fluorescently labeled MNP-SS nanoparticles for 24 h.



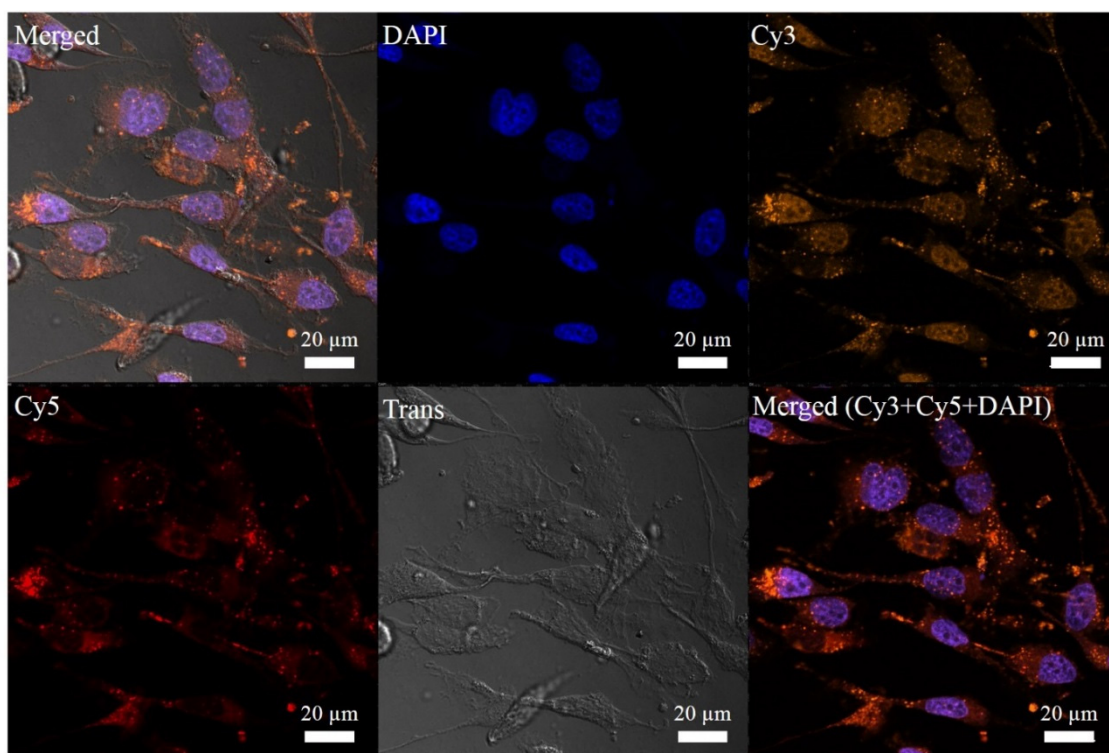

**Figure S4.** PC3 cells incubated with Cy3 and Cy5 fluorescently labeled MNP-SS nanoparticles for 48 h.

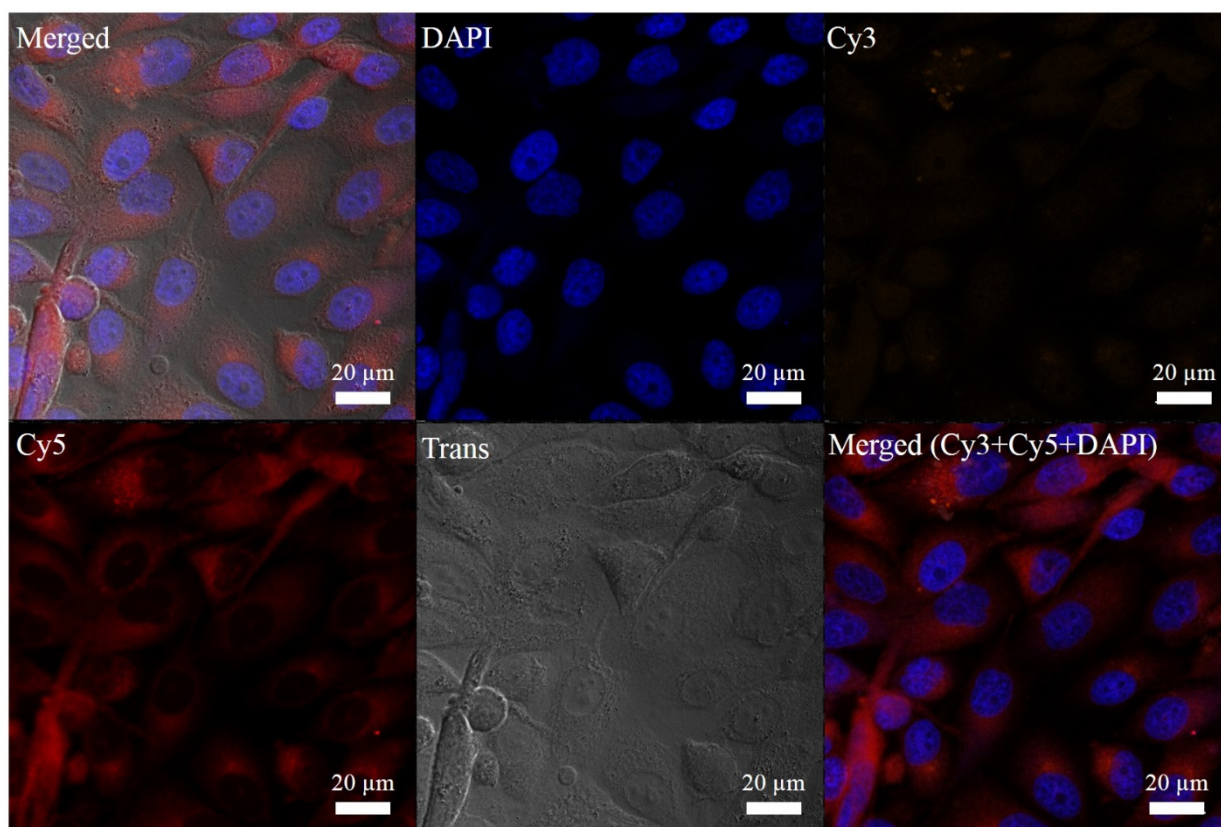

**Figure S5.** PC3 cells incubated with Cy3 and Cy5 fluorescently labeled MNP-SS nanoparticles for 72 h.

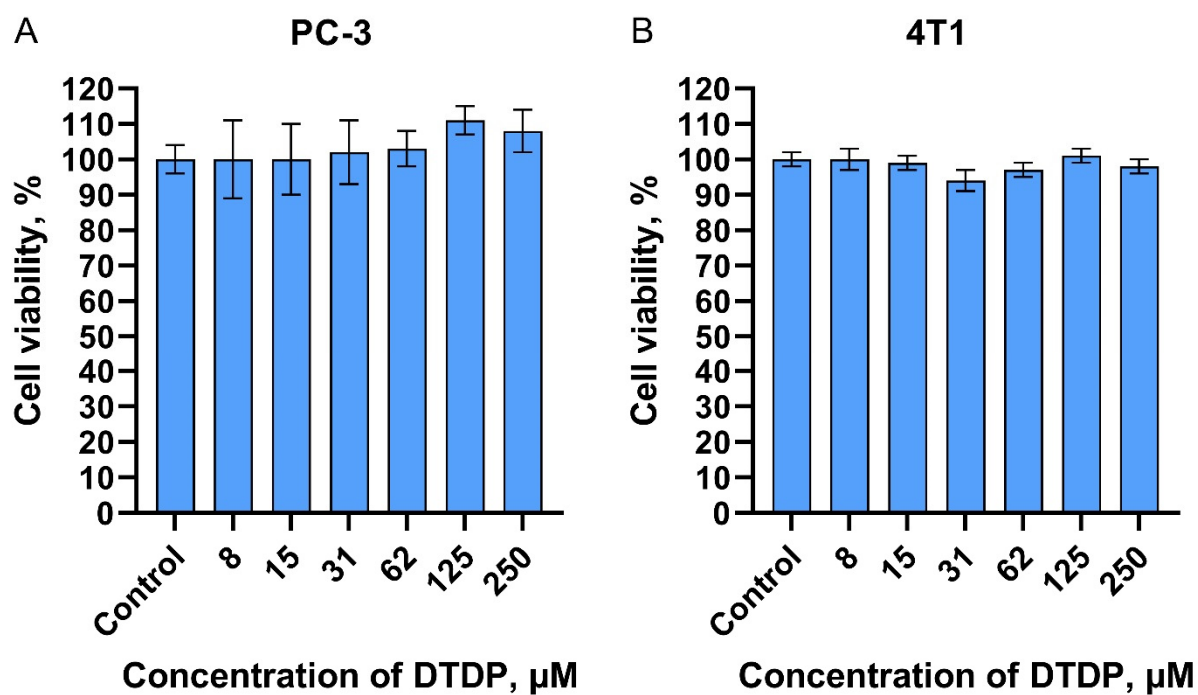

**Figure S6.** Evaluation of cytotoxicity of pristine DTDP on PC-3 (A) and 4T1 (B) cells.

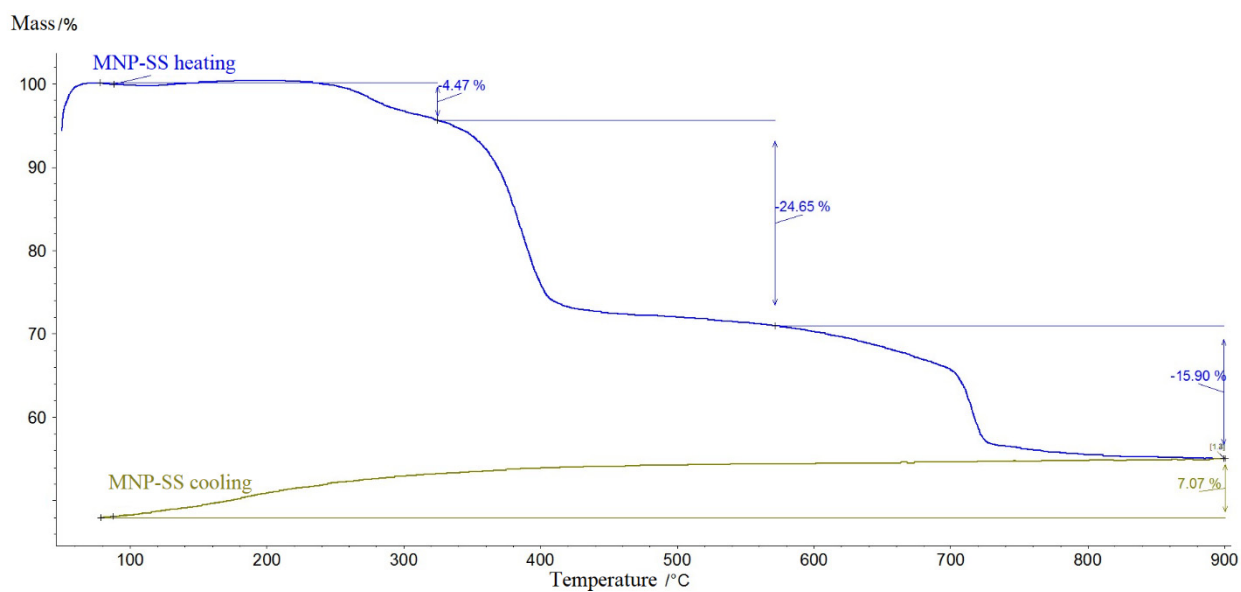

**Figure S7.** TGA data for the MNP-SS sample.
